# Supplementary material
Source: PubMed Central journal article supplement (PMC3329516)

Figure S1. Detection of Id3 protein in cultured human islets infected with an adenovirus expressing Id3. Monolayer cultures of human islets were infected with adenoviral vectors expressing Ad-LacZ (A, C) or Ad-Id3 (B, D). Id3 (red) and insulin (green) expression were analyzed by immunofluorescence 48 h after infection. Blue nuclear counterstain is DAPI. Scale bars, A-D = 100 $\mu$ m

Figure S2. p57<sup>Kip2</sup> downregulation by Id3 is cell autonomous. Monolayer cultures of islets were infected with adenoviral vectors expressing Ad-LacZ (A) or Ad-Id3 (B). p57<sup>Kip2</sup> (red) and Id3 (green) expression were analyzed by immunofluorescence 48 h after infection. Scale bars = 100 $\mu$ m

Figure S3. Range of donors' ages for human islet preparations. The effects of Id3 on BrdU incorporation and DNA damage in  $\beta$ -cells were independent of donor age. The median age of donors was 43.7 y (n = 17).

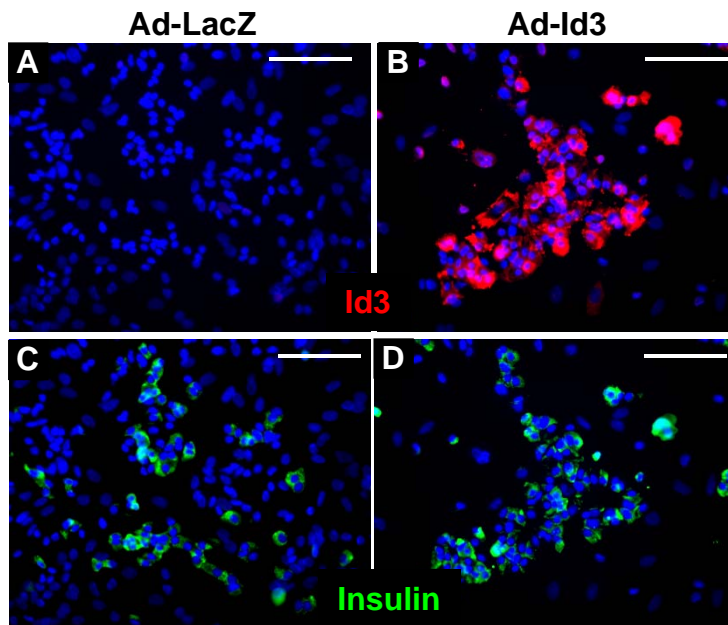

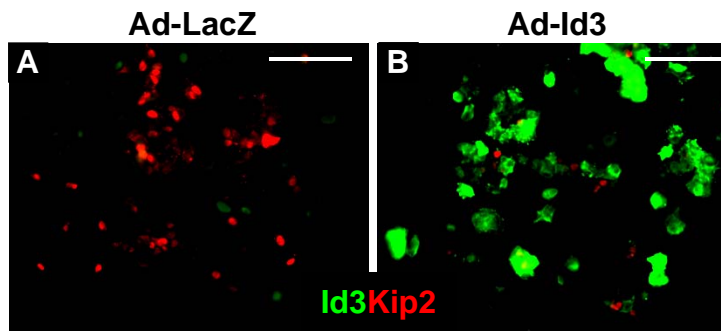

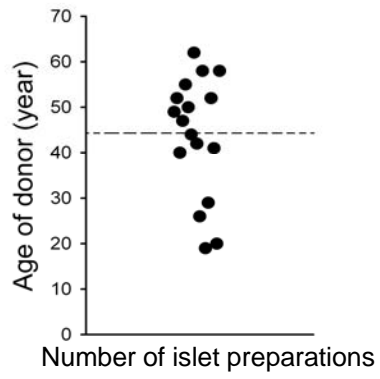

Supplement: isl-3-358-s1.pdf [file isl-3-358-s1.pdf]
